# Supplementary material for: RNA‐Binding Protein IGF2BP2/IMP2 is a Critical Maternal Activator in Early Zygotic Genome Activation
Source: PubMed Central journal article supplement (PMC6685478; doi:10.1002/advs.201900295), 2019-05-24
Supplement: ADVS-6-1900295-s001.pdf [file ADVS-6-1900295-s001.pdf]

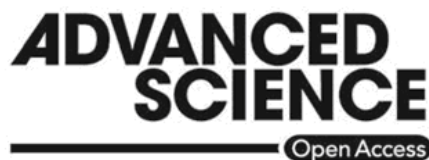

## Supporting Information

for *Adv. Sci.*, DOI: 10.1002/adv.201900295

RNA-Binding Protein IGF2BP2/IMP2 is a Critical Maternal Activator in Early Zygotic Genome Activation

*Hong-Bin Liu, Tahir Muhammad, Yueshuai Guo, Meng-Jing Li, Qian-Qian Sha, Chuan-Xin Zhang, Hui Liu, Shi-Gang Zhao, Han Zhao, Hao Zhang, Yan-Zhi Du, Kang Sun, Kui Liu, Gang Lu, Xue-Jiang Guo, Jiahao Sha, Heng-Yu Fan, Fei Gao, and Zi-Jiang Chen\**

Copyright WILEY-VCH Verlag GmbH & Co. KGaA, 69469 Weinheim, Germany, 2019.

## **Supporting Information**

### **RNA-Binding Protein IGF2BP2/IMP2 is a Critical Maternal Activator in Early Zygotic Genome Activation**

*Hong-Bin Liu, Tahir Muhammad, Yueshuai Guo, Meng-Jing Li, Qian-Qian Sha, Chuan-Xin Zhang, Hui Liu, Shi-Gang Zhao, Han Zhao, Hao Zhang, Yan-Zhi Du, Kang Sun, Kui Liu, Gang Lu, Xue-Jiang Guo, Jiahao Sha, Heng-Yu Fan, Fei Gao, Zi-Jiang Chen*

## Supporting Information

### **RNA-Binding Protein IGF2BP2/IMP2 is a Critical Maternal Activator in Early Zygotic Genome Activation**

*Hong-Bin Liu, Tahir Muhammad, Yueshuai Guo, Meng-Jing Li, Qian-Qian Sha, Chuan-Xin Zhang, Hui Liu, Shi-Gang Zhao, Han Zhao, Hao Zhang, Yan-Zhi Du, Kang Sun, Kui Liu, Gang Lu, Xue-Jiang Guo, Jiahao Sha, Heng-Yu Fan, Fei Gao, Zi-Jiang Chen\**

These authors contributed equally: Hong-Bin Liu, Tahir Muhammad, and Yueshuai Guo

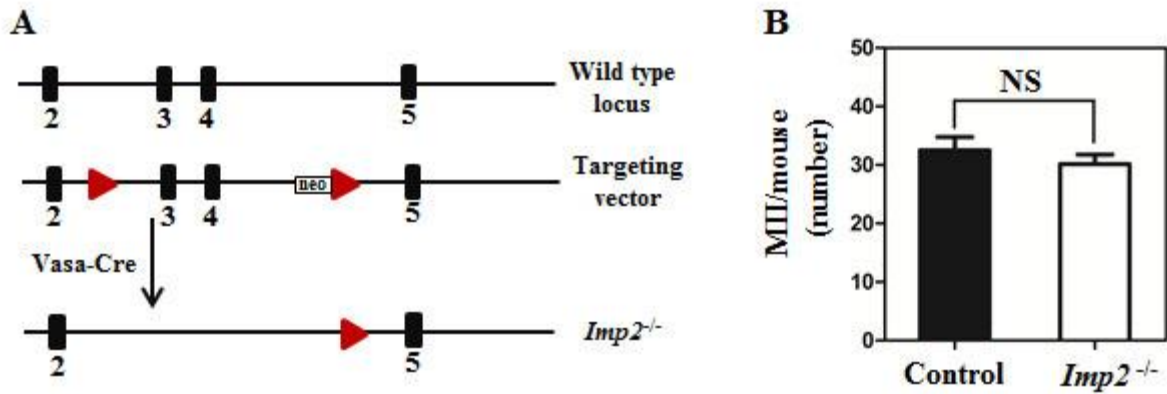

**Figure S1. Establishing the *Imp2<sup>-/-</sup>* mouse and oogenesis.**

(A) Schematic diagram showing the gene-targeting vector for creating the conditional *Imp2*-knockout mouse. Loxp recombination sites (red triangles) along with a flanked neomycin-selection cassette were introduced flanking exon 3.

(B) MII oocytes were recovered from hormonally stimulated control (n = 10) and *Imp2<sup>-/-</sup>* (n = 10) females at 16 h after hCG administration. NS, no statistical difference in Student's *t*-test,  $p > 0.05$ .

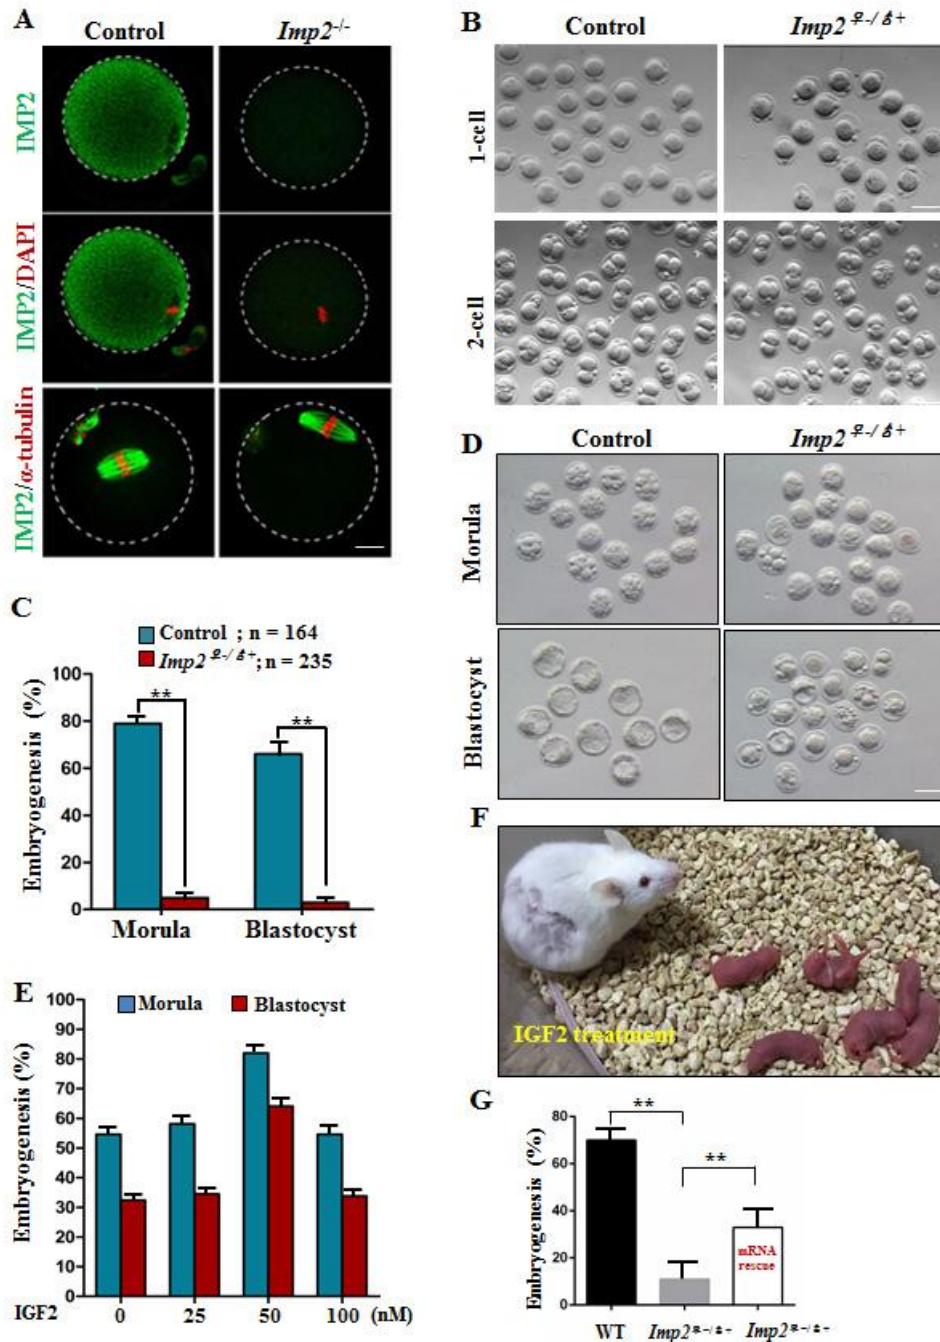

**Figure S2. *Imp2* is dispensable for fertilization but is essential for blastocyst development.**

(A) Immunofluorescence results for control and *Imp2*<sup>-/-</sup> MII oocytes. Dashed circles represent the outlines of the oocytes. Scale bar, 10  $\mu$ m.

**(B)** After hormonal stimulation and *in vivo* mating with wild-type males, 1-cell and 2-cell-stage embryos were flushed from control and *Imp2*<sup>-/-</sup> female oviducts at embryonic days 0.5 and 1.5. n > 5 mice for each genotype. Scale bar, 100 μm.

**(C)** Deletion of maternal *Imp2* causes impaired morula and blastocyst formation in *Imp2*<sup>-/-</sup> females *in vitro*. n > 7 mice for each genotype. Error bars showing the SEM. \*\**p* < 0.01, Student's *t*-test.

**(D)** Morphology of embryos collected from the uteri of control and *Imp2*<sup>-/-</sup> female mice at embryonic days 2.5 and 3.5 after successful mating with adult WT males. Scale bar, 100 μm. n > 6 for both genotypes.

**(E)** Quantification showing that the 50 nM IGF2 concentration is optimum for early embryonic development. n > 10 mice were used. Error bars indicate the SEM.

**(F)** Photographs showing the healthy pups delivered by the IGF2 treatment group after embryo transfer.

**(G)** Representing graph of blastocyst developing from zygotes that had been microinjected with *Imp2* mRNA in *Imp2*<sup>-/-</sup> females-derived zygotes. WT zygotes used as positive control. Error bars showing the SEM. \*\**p* < 0.01, Student's *t*-test.

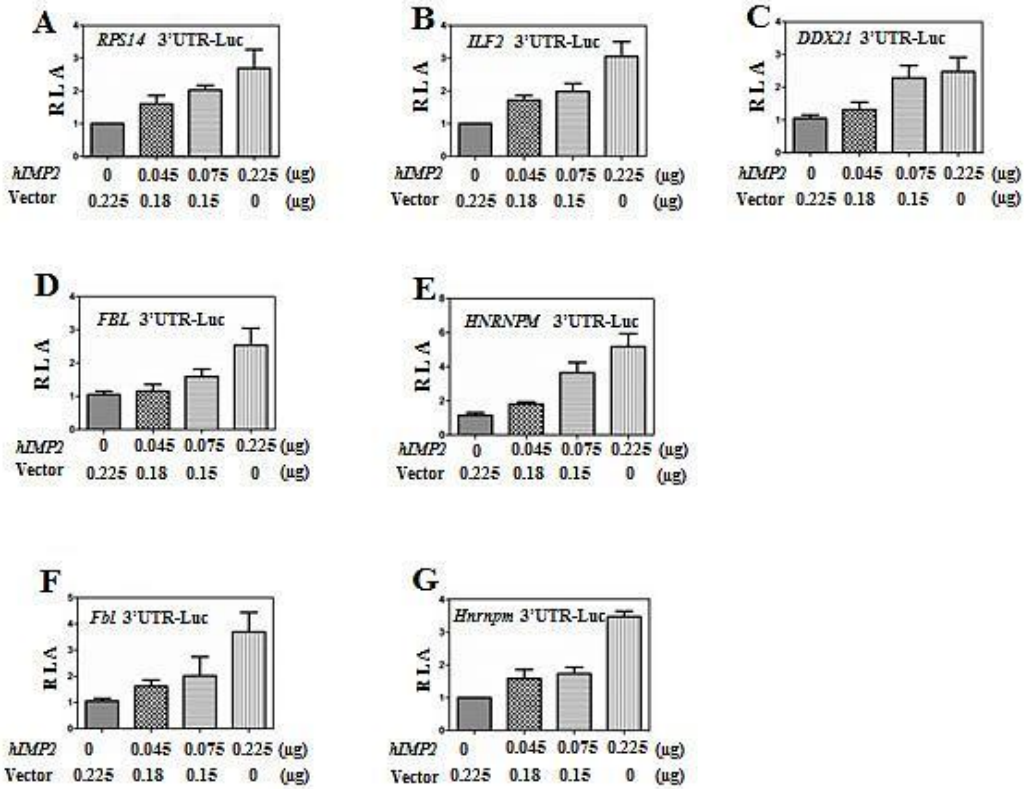

**Figure S3. Luciferase reporter activity of downregulated genes.**

(A–E) Luciferase activity of indicated downstream genes for RPS14 (A), ILF2 (B), DDX21 (C), FBL (D), and HNRNPM (E) in response to *IMP2* in human. Error bars indicate the SEM. (F and G) Luciferase activity of *Fbl* (F) and *Hnrnpm* (G) downstream genes in response to *IMP2* in mice. Error bars indicate the SEM. Each value represents the mean of at least three independent experiments.

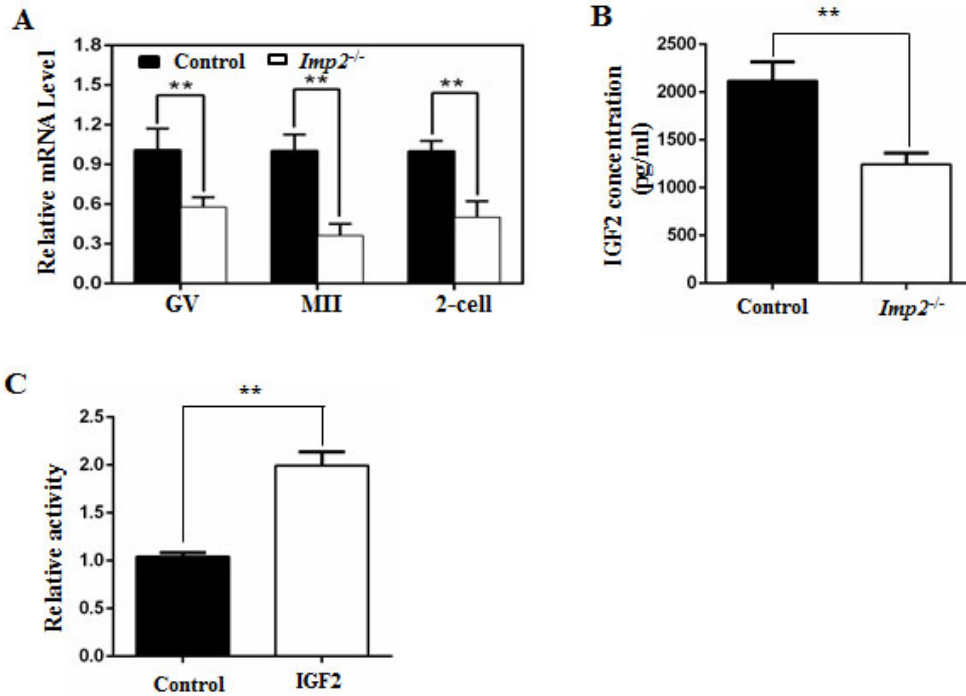

**Figure S4. Direct relationship of IMP2 with IGF2.**

(A) qPCR results showing mRNA level of *IGF2* in GV-stage, MII-stage oocytes and 2-cell-stage embryos-derived from control and *Imp2*<sup>-/-</sup> female. Error bars showing the SEM. \*\**p* < 0.01, Student's *t*-test.

(B) IGF2 concentrations in culture medium containing GV-stage oocytes of different genotypes. GV-stage oocytes derived from control and *Imp2*<sup>-/-</sup> female mice were cultured in M16 medium supplemented with 2  $\mu$ M milrinone for 12 h. Error bars showing the SEM. \*\**p* < 0.01, Student's *t*-test.

(C) In human HEK293 cells, IMP2 enhanced the luciferase activity of IGF2 by 2-fold compared with negative control. Error bars showing the SEM. \*\**p* < 0.01, Student's *t*-test.



**Table S1. Gene description.**

| <b>Gene Symbol</b> | <b>Species</b> | <b>Gene name</b>                              | <b>Transcription binding sites</b> |
|--------------------|----------------|-----------------------------------------------|------------------------------------|
| <i>CCAR1</i>       | Human          | cell division cycle and apoptosis regulator 1 | CATCTCCTACCATCTATACACAG            |
| <i>Ccar1</i>       | mouse          | cell division cycle and apoptosis regulator 1 | CATCTCCTACCATTTATACCCAGCAG         |
| <i>FBL</i>         | human          | Fibrillarin                                   | AAGAGGACCAACATCATTCTGTGATCGAGGA    |
| <i>Fbl</i>         | mouse          | Fibrillarin                                   | AAGAGGACTAACATTATTCCTGTAATTGA      |
| <i>HNRNPM</i>      | human          | Heterogeneous nuclear ribonucleoprotein M     | CCAAGGCCTCTCTCAATGGGGCTGATA        |
| <i>Hnrnmp</i>      | mouse          | heterogeneous nuclear ribonucleoprotein M     | CCAAGGCCTCACTCAATGGGGCTGACA        |
| <i>FYTTD1</i>      | human          | forty-two-three domain containing 1           | CTTTTCACATAGGCCAAGAACTCATTGCAAAA   |
| <i>ILF2</i>        | human          | interleukin enhancer binding factor 2         | CCATCCATCTATAATGGAGGATACC AACATT   |
| <i>RPS14</i>       | human          | ribosomal protein S14                         | TCACCCACAAACACACACCAAG             |
| <i>DDX21</i>       | human          | DEXD-box helicase 21                          | CTTCACTTAAATTATTCATCTG             |
| <i>RPL32</i>       | human          | Ribosomal protein L32                         | TACATAGGTCATGAGGGATATG             |
| <i>PHGDH</i>       | human          | phosphoglycerate dehydrogenase                | AGGGAGAGAAAATCCCACTCTTGGGCTGAAC    |
| <i>PSAT1</i>       | human          | phosphoserine aminotransferase 1              | TTAAATCACCTATCCTTTG                |
| <i>HNRNPA2B1</i>   | human          | heterogeneous nuclear ribonucleoprotein A2/B1 | ATTATTTAACAACATTACCTTACTG          |

**Table S2. Primer Sequences.**

| Gene name      | Primers Sequence                                                | Uses      |
|----------------|-----------------------------------------------------------------|-----------|
| <i>Ddx21</i>   | F: 5'-TGATGTCCGAAGTGAAGCAG-3'<br>R: 5'-TCGATATCCGTCTGGAGGTC-3'  | Real-time |
| <i>Ccar1</i>   | F: 5'-CCAAAACCAAAACGGAGAAA-3'<br>R: 5'-TTCCTCCTCCTCCCTATCGT-3'  |           |
| <i>Hnrnpm</i>  | F: 5'-GCTGGAAGACTTGGAAGCAC-3'<br>R: 5'-TCACAATGCCTATTCCACGA-3'  |           |
| <i>Ilf2</i>    | F: 5'-ATTCTGGCTGCAGGACTGTT-3'<br>R: 5'-AAGCCTCCATGGGAGAGAAT-3'  |           |
| <i>Fyttl1</i>  | F: 5'-AGACACTCGTCAGGCAACCT-3'<br>R: 5'-ATTGACGCGTTCTCTTTGCT-3'  |           |
| <i>Rpl32</i>   | F: 5'-AACCAGAGGCATTGACAAC-3'<br>R: 5'-ATTGTGGACCAGGAACTTGC-3'   |           |
| <i>Rps14</i>   | F: 5'-CAAGGGGAAGGAAAAGAAGG-3'<br>R: 5'-GAGGACTCATCTCGGTCAGC-3'  |           |
| <i>Gtf2i</i>   | F: 5'-CCTGCCGAAGATGAAGAGTC-3'<br>R: 5'-TTCGGTTCCAACAACAACA-3'   |           |
| <i>Mpc2</i>    | F: 5'-TGTTGCTGCCAAGAAATTG-3'<br>R: 5'-GCTAGTCCAGCACACACCAA-3'   |           |
| <i>Set</i>     | F: 5'-CACGAAGAGCCAGAGAGCTT-3'<br>R: 5'-CATGTCGGGAACCAGGTAGT-3'  |           |
| <i>Sf1</i>     | F: 5'-AGCTAGGGGAAGCTCCTGTC-3'<br>R: 5'-GGCGGCTCTGAGTTGTAGAC-3'  |           |
| <i>Pgrmc1</i>  | F: 5'-TTTTGCCTGGACAAAGAAGC-3'<br>R: 5'-TCCGAGCTGTCTCGTCTTTT-3'  |           |
| <i>Nat10</i>   | F: 5'-AGCCATTTCCCGCTTGTACT-3'<br>R: 5'-CCTGAGGGCAGCTCAATCTC-3'  |           |
| <i>Rps19</i>   | F: 5'-TACACACGAGCTGCTTCCAC-3'<br>R: 5'-CTGGGTCTGACACCGTTTCT-3'  |           |
| <i>Usp10</i>   | F: 5'-GTTCGAGCCTGTCTGAAAAGG-3'<br>R: 5'-GTGTCTTCCAGCTCCTCGTC-3' |           |
| <i>Mrpl4</i>   | F: 5'-GAGATGCCCAAGAATGTCGT-3'<br>R: 5'-CCTGCCAGAGTAGCTTGTCC-3'  |           |
| <i>Dnttip2</i> | F: 5'-AACTGACAGCCAAAACCAC-3'<br>R: 5'-ACTGCTGAAGGCTGGTGTCT-3'   |           |
| <i>Nelfe</i>   | F: 5'-TCTGAAGAAGCAGAGCAGCA-3'<br>R: 5'-ACCAGTTGTTTGGCCTGTTC-3'  |           |
| <i>Hnrnpl</i>  | F: 5'-GAAGCTGACCTTGTGGAAGC-3'<br>R: 5'-CCGGCAATGTAGATCTGGTT-3'  |           |
| <i>Fbl</i>     | F: 5'-TGGTCTGGTCTACGCAGTTG-3'<br>R: 5'-GGGTGTCGAGCATCTTCAAT-3'  |           |
| <i>Phgdh</i>   | F: 5'-GGAGGCTTTCCAGTTCTGCT-3'<br>R: 5'-CTGCGATCCCCTCTCCCTAT-3'  |           |
| <i>Ccar1</i>   | F: 5'-CCAGCAAACCTATCAGTTAA-3'                                   | siRNA     |

|                      |                                                                  |            |
|----------------------|------------------------------------------------------------------|------------|
|                      | R: 5'CCAGTCAACAGCAAACACTCA-3'                                    |            |
| <i>Rps14</i>         | F: 5' TGGAGACGACGATCAGAAA-3'<br>R: 5' TCACTGCCCTGCACATCAA-3'     |            |
| <i>Imp2 +flox-62</i> | F: 5'-CAGCCCCGAGTGAGGAGAGTAGC-3'<br>R: 5'-CCCCATCGACCCCCAGTTT-3' | Genotyping |
| <i>Imp2 Δ-50</i>     | F: 5'-CAATACTTCTGGACTTTTCA-3'<br>R: 5'-CTTTCCTGGAGACTTTATG-3'    |            |

**Table S3. Antibody information.**

| <b>Protein name</b> | <b>Manufacture (catalogue number)</b> | <b>Applications (working dilution)</b> |
|---------------------|---------------------------------------|----------------------------------------|
| IGF2BP2             | Cell signaling (14672)                | WB(1:1000)                             |
| IGF2BP2             | Abcam (ab124930)                      | IF(1:250)                              |
| CCAR1               | Gentex (GTX110892)                    | WB(1:200)                              |
| FBL                 | Abcam (ab166630)                      | WB(1:250)                              |
| RPS14               | Proteintech (16683-1-AP)              | WB(1:100)                              |
| DDX21               | Santa cruz (sc-376785)                | WB(1:50)                               |
| ILF2                | Abcam (ab154169)                      | WB(1:300)                              |
| ACTIN               | Cell signaling (4970)                 | WB(1:1000)                             |
| ERK1/2              | Santa Cruz (sc-94)                    | WB(1:1000)                             |

**Table S4. RNA seq and protein merged analysis.**

| <b>NO</b> | <b>Gene Name</b> | <b>Read count KO</b> | <b>Read count WT</b> | <b>log2.Fold</b> | <b>CLIP binding</b> | <b>Expression status</b> |
|-----------|------------------|----------------------|----------------------|------------------|---------------------|--------------------------|
| 1         | <i>Parp1</i>     | 81.50                | 166.66               | -1.03            | Y                   | Down-regulated           |
| 2         | <i>Mrpl4</i>     | 44.11                | 112.39               | -1.35            | Y                   | Down-regulated           |
| 3         | <i>Actn2</i>     | 4.62                 | 25.07                | -2.44            |                     | Down-regulated           |
| 4         | <i>Dnttip2</i>   | 77.01                | 387.65               | -2.33            |                     | Down-regulated           |
| 5         | <i>Ilf2</i>      | 133.52               | 357.82               | -1.42            | Y                   | Down-regulated           |
| 6         | <i>Gtf2i</i>     | 20.89                | 79.69                | -1.93            | Y                   | Down-regulated           |
| 7         | <i>Nelfe</i>     | 17.28                | 51.36                | -1.57            |                     | Down-regulated           |
| 8         | <i>Fyttd1</i>    | 21.75                | 47.88                | -1.14            | Y                   | Down-regulated           |
| 9         | <i>Usp10</i>     | 173.27               | 348.32               | -1.01            | Y                   | Down-regulated           |
| 10        | <i>Mpc2</i>      | 39.26                | 108.95               | -1.47            |                     | Down-regulated           |
| 11        | <i>Hnrnpm</i>    | 67.83                | 268.41               | -1.98            |                     | Down-regulated           |
| 12        | <i>Sntb2</i>     | 25.65                | 75.90                | -1.57            | Y                   | Down-regulated           |
| 13        | <i>Rps14</i>     | 30.04                | 79.59                | -1.41            | Y                   | Down-regulated           |
| 14        | <i>Psat1</i>     | 81.21                | 368.99               | -2.18            | Y                   | Down-regulated           |
| 15        | <i>Syncrip</i>   | 31.52                | 96.54                | -1.61            |                     | Down-regulated           |
| 16        | <i>Ddx21</i>     | 50.57                | 232.77               | -2.20            | Y                   | Down-regulated           |
| 17        | <i>Ccar1</i>     | 223.32               | 557.25               | -1.32            | Y                   | Down-regulated           |
| 18        | <i>Hnrnpl</i>    | 47.62                | 103.81               | -1.12            | Y                   | Down-regulated           |
| 19        | <i>Gatad2b</i>   | 62.64                | 131.51               | -1.07            |                     | Down-regulated           |
| 20        | <i>Rps19</i>     | 21.42                | 65.12                | -1.60            |                     | Down-regulated           |
| 21        | <i>Hnrnpa2b1</i> | 310.34               | 630.17               | -1.02            | Y                   | Down-regulated           |
| 22        | <i>Set</i>       | 347.04               | 998.66               | -1.52            |                     | Down-regulated           |
| 23        | <i>Rpl32</i>     | 29.49                | 70.05                | -1.25            | Y                   | Down-regulated           |
| 24        | <i>Sfl</i>       | 90.16                | 190.67               | -1.08            | Y                   | Down-regulated           |
| 25        | <i>Pgrmc1</i>    | 34.41                | 75.15                | -1.13            | Y                   | Down-regulated           |
| 26        | <i>Phgdh</i>     | 15.38                | 76.50                | -2.31            | Y                   | Down-regulated           |
| 27        | <i>Rpl23</i>     | 28.63                | 71.64                | -1.32            |                     | Down-regulated           |
| 28        | <i>Fbl</i>       | 58.81                | 163.32               | -1.47            | Y                   | Down-regulated           |
| 29        | <i>Nat10</i>     | 37.06                | 127.43               | -1.78            |                     | Down-regulated           |
| 30        | <i>Gls</i>       | 35.29                | 118.00               | -1.74            | Y                   | Down-regulated           |
| 31        | <i>Rbm10</i>     | 90.19                | 256.81               | -1.51            | Y                   | Down-regulated           |
| 32        | <i>Gar1</i>      | 27.29                | 82.57                | -1.60            |                     | Down-regulated           |
| 33        | <i>Cit</i>       | 118.99               | 42.17                | 1.50             |                     | Up-regulated             |
| 34        | <i>Degs1</i>     | 322.77               | 95.51                | 1.76             |                     | Up-regulated             |

**Table S5. Human IGF2 binding sites (L3)**

| <b>Binding site</b> | <b>Location</b>       | <b>Sequence</b>                                                           |
|---------------------|-----------------------|---------------------------------------------------------------------------|
| #1                  | chr11:2159633-2159699 | AAAAGTACAACATCTGGCCCGCCCCAGCCCGAAGAC<br>AGCCCGTCCTCCCTGGACAATCAGACGAATT   |
| #2                  | chr11:2160385-2160454 | TCCCGGGCGCCGTCCGCGGGGTCGCGCTCCGCCGGGC<br>CTGCGGATTCCCCGCCGCTCCTCTTCATCTAC |
| #3                  | chr11:2160478-2160514 | CCTCCATCGGGCAAGGCGGCCCGCGTCGACGCCGCC                                      |

**Table S6. List of ZGA relevant genes after merging 2-cell-stage embryos proteomic data compared with published PAR-CLIP data**

| <b>No</b> | <b>Gene Name</b> |
|-----------|------------------|
| 1         | <i>Ilf2</i>      |
| 2         | <i>Ptms</i>      |
| 3         | <i>Gnb2</i>      |
| 4         | <i>Snx5</i>      |
| 5         | <i>Rps14</i>     |
| 6         | <i>Ptges3</i>    |
| 7         | <i>Hplbp3</i>    |
| 8         | <i>Psat1</i>     |
| 9         | <i>Rpl27a</i>    |
| 10        | <i>Rpl31</i>     |
| 11        | <i>Cbx3</i>      |
| 12        | <i>Idha</i>      |
| 13        | <i>Rpl38</i>     |
| 14        | <i>Enah</i>      |
| 15        | <i>Prkaca</i>    |
| 16        | <i>Rbm10</i>     |
| 17        | <i>Rpl28</i>     |
| 18        | <i>Tagn2</i>     |
| 19        | <i>Hnrnp3</i>    |
| 20        | <i>Hk1</i>       |
| 21        | <i>Pls3</i>      |
| 22        | <i>Bag3</i>      |
